# Supplementary material for: Genetic Potential of Tropically Adapted Exotic Maize (Zea mays L.) Heat-Tolerant Donor Lines in Sub-Tropical Breeding Programs
Source: MDPI journal article supplement (doi:10.3390/agronomy13082050), 2023-08-02
Supplement: s1 [file s1]

## Supplementary Materials

### Supplementary Tables

Table S1 The specific combining ability (SCA) effects of heat tolerant donors and CIMMYT elite lines evaluated under heat stress and optimal conditions during 2020 winter season.

| Entry | Cross                | Managed Heat |      | Optimal Management |      | Across      |      |
|-------|----------------------|--------------|------|--------------------|------|-------------|------|
|       |                      | SCA (tha-1)  | Rank | SCA (tha-1)        | Rank | SCA (tha-1) | Rank |
| 171   | DJ265-15 x VL1018816 | 1.05**       | 1    | 0.03               | 84   | 0.53        | 18   |
| 30    | DJ267-9 x CAL1440    | 0.73*        | 2    | 0.7                | 24   | 0.74        | 8    |
| 2     | DJ267-9 x CAL14138   | 0.7          | 3    | -0.21              | 107  | 0.2         | 56   |
| 123   | DJ267-9 x ZL1312     | 0.67         | 4    | 0.93               | 12   | 0.86        | 4    |
| 16    | DJ265-15 x CAL1412   | 0.62         | 5    | 0.3                | 53   | 0.49        | 23   |
| 93    | DJ267-6 x VL1010762  | 0.6          | 6    | -0.23              | 114  | 0.17        | 63   |
| 81    | DJ265-14 x VL143518  | 0.6          | 7    | 0.39               | 44   | 0.52        | 19   |
| 109   | DJ267-5 x CAL14113   | 0.54         | 8    | 1                  | 9    | 0.83        | 5    |
| 102   | DJ265-15 x VL1010762 | 0.54         | 9    | 0.63               | 29   | 0.62        | 14   |
| 37    | DJ265-15 x CAL1440   | 0.53         | 10   | -0.43              | 133  | 0           | 97   |
| 23    | DJ194-3 x CAL1412    | 0.51         | 11   | -0.15              | 100  | 0.17        | 64   |
| 66    | DJ267-5 x VL109126   | 0.45         | 12   | -0.48              | 136  | -0.04       | 103  |
| 49    | DJ265-13 x ZL132077  | 0.44         | 13   | -0.26              | 118  | 0.08        | 81   |
| 53    | DJ194-3 x VL109126   | 0.44         | 14   | 0.16               | 71   | 0.31        | 40   |
| 166   | DJ194-10 x VL1018816 | 0.44         | 15   | 0.86               | 14   | 0.68        | 10   |
| 165   | DJ267-5 x VL1018816  | 0.42         | 16   | 0.53               | 32   | 0.51        | 20   |
| 63    | DJ194-2 x CAL1469    | 0.42         | 17   | 0.05               | 81   | 0.22        | 55   |
| 159   | DJ265-14 x CAL152    | 0.42         | 18   | -0.48              | 137  | -0.06       | 109  |
| 112   | DJ265-6 x CAL14113   | 0.42         | 19   | -0.48              | 135  | -0.05       | 105  |
| 122   | DJ265-14 x ZL1312    | 0.41         | 20   | -0.22              | 111  | 0.09        | 79   |
| 61    | DJ267-9 x CAL1469    | 0.41         | 21   | -0.7               | 153  | -0.2        | 125  |
| 110   | DJ267-8 x CAL14113   | 0.4          | 22   | 0.39               | 43   | 0.42        | 29   |
| 18    | DJ267-7 x CAL1412    | 0.38         | 23   | 0.04               | 83   | 0.23        | 52   |
| 6     | DJ267-8 x CAL14138   | 0.38         | 24   | -0.14              | 97   | 0.07        | 82   |
| 11    | DJ265-10 x CAL14138  | 0.36         | 25   | 1.34*              | 4    | 0.89*       | 1    |
| 41    | DJ265-8 x ZL132077   | 0.35         | 26   | 0.23               | 62   | 0.31        | 41   |
| 148   | DJ265-15 x ZL111056  | 0.35         | 27   | -0.32              | 122  | -0.01       | 100  |
| 28    | DJ265-15 x CAL1440   | 0.34         | 28   | 0.26               | 58   | 0.29        | 45   |
| 170   | DJ265-8 x VL1018816  | 0.34         | 29   | 1.09               | 8    | 0.77        | 6    |
| 103   | DJ267-8 x VL1010762  | 0.33         | 30   | -0.4               | 130  | -0.04       | 102  |
| 72    | DJ265-13 x VL109126  | 0.32         | 31   | 0.15               | 74   | 0.24        | 51   |
| 9     | DJ194-2 x CAL14138   | 0.31         | 32   | 0.74               | 20   | 0.55        | 17   |
| 17    | DJ265-8 x CAL1412    | 0.31         | 33   | 0.14               | 75   | 0.25        | 50   |

|     |                      |      |    |       |     |       |     |
|-----|----------------------|------|----|-------|-----|-------|-----|
| 65  | DJ265-14 x CAL1469   | 0.3  | 34 | -0.22 | 110 | 0.01  | 95  |
| 83  | DJ267-5 x CAL14135   | 0.3  | 35 | 0.24  | 60  | 0.3   | 43  |
| 74  | DJ265-10 x VL143518  | 0.3  | 36 | 0.29  | 54  | 0.32  | 37  |
| 120 | DJ194-2 x CAL14113   | 0.29 | 37 | 0.46  | 40  | 0.4   | 31  |
| 107 | DJ267-7 x VL143518   | 0.29 | 38 | 0.57  | 30  | 0.46  | 25  |
| 124 | DJ265-15 x ZL1312    | 0.29 | 39 | -0.25 | 115 | 0.01  | 93  |
| 14  | DJ265-15 x CAL14138  | 0.28 | 40 | 0.5   | 34  | 0.38  | 33  |
| 7   | DJ194-10 x CAL14138  | 0.28 | 41 | 0.47  | 38  | 0.38  | 34  |
| 132 | DJ265-15 x CAL14113  | 0.26 | 42 | -0.19 | 106 | 0.03  | 88  |
| 172 | DJ267-8 x VL1018816  | 0.26 | 43 | 0.12  | 78  | 0.2   | 59  |
| 76  | DJ267-9 x VL143518   | 0.25 | 44 | 0.76  | 19  | 0.55  | 16  |
| 43  | DJ267-9 x ZL132077   | 0.25 | 45 | 0.12  | 77  | 0.19  | 60  |
| 126 | DJ267-8 x ZL1312     | 0.25 | 46 | -0.18 | 104 | 0.04  | 86  |
| 108 | DJ265-8 x VL143518   | 0.24 | 47 | 0.97  | 10  | 0.67  | 12  |
| 137 | DJ265-13 x ZL111056  | 0.24 | 48 | -0.95 | 163 | -0.41 | 146 |
| 135 | DJ267-6 x ZL111056   | 0.24 | 49 | 0.25  | 59  | 0.25  | 49  |
| 152 | DJ267-5 x CAL152     | 0.23 | 50 | 0.18  | 66  | 0.2   | 57  |
| 168 | DJ267-7 x VL1018816  | 0.23 | 51 | 0.02  | 86  | 0.14  | 70  |
| 96  | DJ267-5 x VL1010762  | 0.22 | 52 | 0.3   | 52  | 0.29  | 47  |
| 154 | DJ265-6 x CAL152     | 0.21 | 53 | 0.17  | 68  | 0.18  | 62  |
| 118 | DJ267-9 x CAL14113   | 0.2  | 54 | -0.17 | 102 | 0.02  | 92  |
| 73  | DJ265-6 x VL109126   | 0.2  | 55 | 0.85  | 15  | 0.56  | 15  |
| 47  | DJ194-10 x ZL132077  | 0.19 | 56 | 0.71  | 23  | 0.5   | 21  |
| 92  | DJ265-8 x CAL14135   | 0.19 | 57 | 0.03  | 85  | 0.13  | 71  |
| 79  | DJ267-5 x VL143518   | 0.18 | 58 | -1.03 | 166 | -0.47 | 149 |
| 97  | DJ194-10 x VL1010762 | 0.18 | 59 | 0.65  | 27  | 0.46  | 28  |
| 129 | DJ265-8 x ZL1312     | 0.18 | 60 | 0.18  | 67  | 0.2   | 58  |
| 70  | DJ265-10 x VL109126  | 0.18 | 61 | 1.42* | 2   | 0.88* | 2   |
| 156 | DJ265-10 x CAL152    | 0.18 | 62 | -0.34 | 127 | -0.12 | 114 |
| 88  | DJ194-10 x CAL14135  | 0.18 | 63 | 1.12  | 7   | 0.73  | 9   |
| 69  | DJ267-9 x VL109126   | 0.18 | 64 | 1.19  | 6   | 0.75  | 7   |
| 24  | DJ265-14 x CAL1412   | 0.17 | 65 | 0.04  | 82  | 0.13  | 72  |
| 104 | DJ194-3 x VL1010762  | 0.15 | 66 | 0.15  | 72  | 0.17  | 66  |
| 82  | DJ267-7 x CAL14135   | 0.15 | 67 | -0.15 | 98  | 0.01  | 94  |
| 38  | DJ194-2 x CAL1440    | 0.13 | 68 | 0.8   | 17  | 0.49  | 24  |
| 64  | DJ265-13 x CAL1469   | 0.12 | 69 | 1.49* | 1   | 0.86  | 3   |
| 157 | DJ265-15 x CAL152    | 0.12 | 70 | 0.5   | 35  | 0.31  | 39  |
| 136 | DJ265-6 x ZL111056   | 0.12 | 71 | 0.42  | 41  | 0.29  | 46  |
| 36  | DJ194-3 x CAL1440    | 0.11 | 72 | -0.21 | 108 | -0.09 | 112 |
| 45  | DJ265-14 x ZL132077  | 0.11 | 73 | -0.23 | 113 | -0.06 | 108 |

|     |                      |       |     |       |     |       |     |
|-----|----------------------|-------|-----|-------|-----|-------|-----|
| 160 | DJ194-3 x CAL152     | 0.1   | 74  | -0.36 | 129 | -0.18 | 120 |
|     | DJ194-3 x VL1018816  | 0.09  | 75  | -0.04 | 92  | 0.02  | 90  |
| 140 | DJ194-10 x ZL111056  | 0.09  | 76  | 0.11  | 79  | 0.1   | 78  |
| 101 | DJ265-10 x VL1010762 | 0.08  | 77  | -0.62 | 150 | -0.29 | 132 |
| 26  | DJ265-6 x CAL1440    | 0.07  | 78  | -1.2  | 171 | -0.65 | 160 |
| 1   | DJ265-6 x CAL14138   | 0.06  | 79  | 0.42  | 42  | 0.23  | 53  |
| 67  | DJ265-15 x VL109126  | 0.06  | 80  | -0.15 | 99  | -0.05 | 104 |
| 4   | DJ265-8 x CAL14138   | 0.06  | 81  | -0.51 | 140 | -0.28 | 131 |
| 161 | DJ265-8 x CAL152     | 0.06  | 82  | 0.88  | 13  | 0.5   | 22  |
| 173 | DJ265-15 x VL1018816 | 0.06  | 83  | -0.18 | 105 | -0.08 | 111 |
| 144 | DJ265-8 x ZL111056   | 0.05  | 84  | 0.16  | 69  | 0.12  | 73  |
| 85  | DJ265-6 x CAL14135   | 0.05  | 85  | -0.33 | 124 | -0.14 | 116 |
| 68  | DJ194-2 x VL109126   | 0.04  | 86  | 0.3   | 51  | 0.19  | 61  |
| 113 | DJ267-6 x CAL14113   | 0.04  | 87  | 0.77  | 18  | 0.46  | 26  |
| 54  | DJ265-8 x VL109126   | 0.03  | 88  | -0.34 | 125 | -0.18 | 121 |
| 130 | DJ265-10 x ZL1312    | 0.02  | 89  | -0.01 | 87  | 0.02  | 91  |
| 145 | DJ265-15 x ZL111056  | 0.01  | 90  | 0.27  | 57  | 0.15  | 68  |
| 46  | DJ265-10 x ZL132077  | 0.01  | 91  | 0.69  | 25  | 0.4   | 32  |
| 87  | DJ265-10 x CAL14135  | 0     | 92  | -0.29 | 119 | -0.13 | 115 |
| 42  | DJ267-5 x ZL132077   | 0     | 93  | 0.27  | 56  | 0.17  | 65  |
| 139 | DJ267-5 x ZL111056   | 0     | 94  | 0.06  | 80  | 0.04  | 87  |
| 22  | DJ194-2 x CAL1412    | 0     | 95  | 0.51  | 33  | 0.3   | 44  |
| 121 | DJ265-8 x CAL14113   | -0.01 | 96  | 0.56  | 31  | 0.31  | 38  |
| 33  | DJ265-10 x CAL1440   | -0.01 | 97  | 0.15  | 73  | 0.06  | 84  |
| 99  | DJ267-7 x VL1010762  | -0.01 | 98  | 0.72  | 21  | 0.42  | 30  |
| 40  | DJ267-5 x ZL1312     | -0.02 | 99  | -0.1  | 95  | -0.06 | 106 |
| 5   | DJ267-6 x CAL14138   | -0.04 | 100 | 0.35  | 48  | 0.15  | 69  |
| 58  | DJ267-7 x CAL1469    | -0.05 | 101 | 1.22  | 5   | 0.64  | 13  |
| 57  | DJ194-10 x CAL1469   | -0.05 | 102 | 0.49  | 36  | 0.23  | 54  |
| 75  | DJ265-15 x VL143518  | -0.05 | 103 | 0.64  | 28  | 0.34  | 35  |
| 12  | DJ265-15 x CAL14138  | -0.05 | 104 | -0.52 | 142 | -0.33 | 139 |
| 89  | DJ267-9 x CAL14135   | -0.06 | 105 | 0.48  | 37  | 0.26  | 48  |
| 39  | DJ267-6 x ZL132077   | -0.06 | 106 | -0.26 | 116 | -0.16 | 119 |
| 134 | DJ194-2 x VL143518   | -0.06 | 107 | -0.31 | 121 | -0.2  | 124 |
| 116 | DJ265-15 x CAL14113  | -0.06 | 108 | -0.31 | 120 | -0.19 | 123 |
| 82  | DJ265-13 x CAL14135  | -0.07 | 109 | -0.7  | 152 | -0.39 | 144 |
| 158 | DJ194-10 x CAL152    | -0.07 | 110 | 0.23  | 61  | 0.08  | 80  |
| 142 | DJ267-7 x ZL111056   | -0.07 | 111 | -0.87 | 161 | -0.5  | 150 |
| 20  | DJ267-9 x CAL1412    | -0.07 | 112 | -0.23 | 112 | -0.15 | 117 |
| 60  | DJ265-10 x CAL1469   | -0.08 | 113 | -0.08 | 94  | -0.09 | 113 |

|     |                      |       |     |       |     |       |     |
|-----|----------------------|-------|-----|-------|-----|-------|-----|
| 91  | DJ265-15 x CAL14135  | -0.09 | 114 | -0.52 | 141 | -0.31 | 134 |
| 151 | DJ265-15 x CAL152    | -0.1  | 115 | 0.71  | 22  | 0.33  | 36  |
| 35  | DJ194-10 x CAL1440   | -0.1  | 116 | 0.29  | 55  | 0.1   | 77  |
| 34  | DJ267-8 x CAL1440    | -0.1  | 117 | 1.35* | 3   | 0.68  | 11  |
| 138 | DJ265-10 x ZL111056  | -0.11 | 118 | 0.22  | 63  | 0.06  | 83  |
| 147 | DJ194-3 x ZL111056   | -0.12 | 119 | 0.93  | 11  | 0.46  | 27  |
| 8   | DJ267-5 x CAL14138   | -0.12 | 120 | -0.26 | 117 | -0.21 | 126 |
| 25  | DJ267-6 x CAL1440    | -0.13 | 121 | -0.34 | 126 | -0.27 | 129 |
| 150 | DJ267-6 x CAL152     | -0.14 | 122 | -0.35 | 128 | -0.28 | 130 |
| 153 | DJ267-9 x CAL152     | -0.15 | 123 | 0.13  | 76  | -0.02 | 101 |
| 141 | DJ267-9 x ZL111056   | -0.15 | 124 | 0.32  | 49  | 0.11  | 74  |
| 133 | DJ267-6 x VL143518   | -0.16 | 125 | -0.03 | 89  | -0.07 | 110 |
| 59  | DJ267-6 x CAL1469    | -0.17 | 126 | -0.43 | 131 | -0.33 | 137 |
| 162 | DJ267-6 x VL1018816  | -0.17 | 127 | -0.6  | 149 | -0.42 | 147 |
| 115 | DJ265-10 x CAL14113  | -0.2  | 128 | -0.57 | 147 | -0.39 | 143 |
| 131 | DJ267-7 x ZL1312     | -0.2  | 129 | -0.53 | 144 | -0.39 | 142 |
| 174 | DJ265-13 x VL1018816 | -0.21 | 130 | 0.2   | 64  | 0     | 96  |
| 90  | DJ194-3 x CAL14135   | -0.22 | 131 | -0.43 | 132 | -0.32 | 136 |
| 143 | DJ265-14 x ZL111056  | -0.22 | 132 | -0.5  | 138 | -0.38 | 140 |
| 106 | DJ265-14 x VL1010762 | -0.22 | 133 | 0.38  | 45  | 0.11  | 76  |
| 32  | DJ265-14 x CAL1440   | -0.22 | 134 | -0.12 | 96  | -0.18 | 122 |
| 13  | DJ194-3 x CAL14138   | -0.24 | 135 | -0.83 | 160 | -0.61 | 158 |
| 105 | DJ265-15x VL1010762  | -0.26 | 136 | 0.2   | 65  | -0.01 | 99  |
| 94  | DJ265-6 x VL1010762  | -0.26 | 137 | -0.69 | 151 | -0.5  | 151 |
| 149 | DJ194-2 x ZL111056   | -0.27 | 138 | -0.18 | 103 | -0.23 | 128 |
| 31  | DJ267-7 x CAL1440    | -0.29 | 139 | 0.46  | 39  | 0.11  | 75  |
| 146 | DJ267-8 x ZL111056   | -0.29 | 140 | -0.04 | 91  | -0.16 | 118 |
| 71  | DJ267-6 x VL109126   | -0.29 | 141 | -0.88 | 162 | -0.62 | 159 |
| 167 | DJ267-9 x VL1018816  | -0.3  | 142 | 0.35  | 47  | 0.05  | 85  |
| 44  | DJ265-6 x ZL132077   | -0.31 | 143 | -0.47 | 134 | -0.4  | 145 |
| 169 | DJ265-14 x VL1018816 | -0.31 | 144 | 0.16  | 70  | -0.06 | 107 |
| 27  | DJ265-13 x CAL1440   | -0.32 | 145 | 0.36  | 46  | 0.02  | 89  |
| 164 | DJ265-10 x VL1018816 | -0.32 | 146 | -0.79 | 158 | -0.6  | 156 |
| 128 | DJ265-8 x ZL1312     | -0.33 | 147 | 0.8   | 16  | 0.3   | 42  |
| 29  | DJ267-5 x CAL1440    | -0.34 | 148 | -1    | 165 | -0.73 | 163 |
| 19  | DJ267-6 x CAL1412    | -0.34 | 149 | -0.71 | 154 | -0.55 | 153 |
| 119 | DJ265-14 x CAL14113  | -0.35 | 150 | -1.15 | 170 | -0.8  | 165 |
| 62  | DJ265-6 x CAL1469    | -0.36 | 151 | -0.07 | 93  | -0.22 | 127 |
| 10  | DJ265-14 x CAL14138  | -0.38 | 152 | 0.68  | 26  | 0.16  | 67  |
| 111 | DJ267-7 x CAL14113   | -0.38 | 153 | -0.75 | 156 | -0.59 | 155 |

|     |                     |          |     |        |     |         |     |
|-----|---------------------|----------|-----|--------|-----|---------|-----|
| 155 | DJ267-7 x CAL152    | -0.39    | 154 | -0.22  | 109 | -0.32   | 135 |
| 48  | DJ194-3 x ZL132077  | -0.39    | 155 | -0.76  | 157 | -0.6    | 157 |
| 114 | DJ194-3 x CAL14113  | -0.4     | 156 | 0.3    | 50  | -0.01   | 98  |
| 80  | DJ194-3 x VL143518  | -0.41    | 157 | -0.57  | 146 | -0.51   | 152 |
| 51  | DJ267-7 x VL109126  | -0.43    | 158 | -1.08  | 167 | -0.81   | 166 |
| 98  | DJ267-9 x VL1010762 | -0.45    | 159 | -0.16  | 101 | -0.29   | 133 |
| 78  | DJ194-10 x VL143518 | -0.49    | 160 | -0.81  | 159 | -0.68   | 161 |
| 95  | DJ265-13x VL1010762 | -0.5     | 161 | -1.32* | 173 | -0.96*  | 169 |
| 100 | DJ265-8 x VL1010762 | -0.58    | 162 | -0.32  | 123 | -0.46.  | 148 |
| 86  | DJ267-6 x CAL14135  | -0.62    | 163 | -0.52  | 143 | -0.57   | 154 |
| 175 | DJ194-2 x VL1018816 | -0.64    | 164 | -1.08  | 168 | -0.91*  | 167 |
| 55  | DJ267-5 x CAL1469   | -0.66    | 165 | -1.25  | 172 | -1.03*  | 171 |
| 3   | DJ265-13 x CAL14138 | -0.69    | 166 | -0.03  | 90  | -0.39   | 141 |
| 15  | DJ267-5 x CAL1412   | -0.7     | 167 | -0.02  | 88  | -0.33   | 138 |
| 50  | DJ194-2 x ZL132077  | -0.79*   | 168 | -0.58  | 148 | -0.7    | 162 |
| 117 | DJ194-10 x CAL14113 | -0.94**  | 169 | -0.51  | 139 | -0.74   | 164 |
| 77  | DJ265-15 x VL143518 | -0.95*   | 170 | -1.33* | 174 | -1.21** | 173 |
| 163 | DJ265-6 x VL1018816 | -1.02**  | 171 | -0.74  | 155 | -0.92*  | 168 |
| 52  | DJ265-14 x VL109126 | -1.04**  | 172 | -1.12  | 169 | -1.14** | 172 |
| 21  | DJ265-6 x CAL1412   | -1.25*** | 173 | -0.55  | 145 | -0.98*  | 170 |
| 127 | DJ265-6 x ZL1312    | -1.49*** | 174 | -0.98  | 164 | -1.34** | 174 |

---
